# Supplementary material for: Single atom modified two-dimensional bismuthenes for toxic gas detection
Source: Royal Society of Chemistry journal article supplement (doi:10.1039/d3cp00103b), 2023-01-01
Supplement: d3cp00103b1.pdf [file d3cp00103b1.pdf]

## Supporting Information of

# Single Atom Modified Two Dimensional Bismuthene for Toxic Gases Detection

An Chen<sup>1,2</sup>, Yanqiang Han<sup>1</sup>, Zhilong Wang<sup>1,2</sup>, Junfei Cai<sup>1,2</sup>, Simin Ye<sup>1,2</sup>, and Jinjin Li<sup>1,\*</sup>

<sup>1</sup>National Key Laboratory of Science and Technology on Micro/Nano Fabrication,  
Shanghai Jiao Tong University, Shanghai, 200240, China

<sup>2</sup>Department of Micro/Nano Electronics, School of Electronic Information and  
Electrical Engineering, Shanghai Jiao Tong university, Shanghai, 200240, China

\*Correspondence to: Jinjin Li ([lijinjin@sjtu.edu.cn](mailto:lijinjin@sjtu.edu.cn))

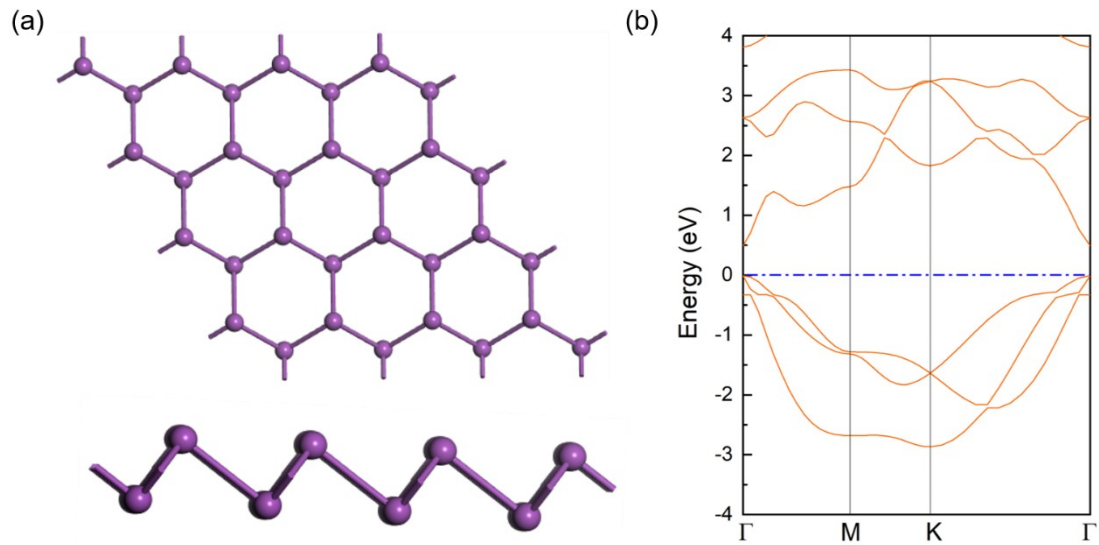

Figure S1. (a) Top view and side view of the optimized pristine bBi. (b) Band structure of the pristine bBi, the blue dotted line presents the Fermi level.

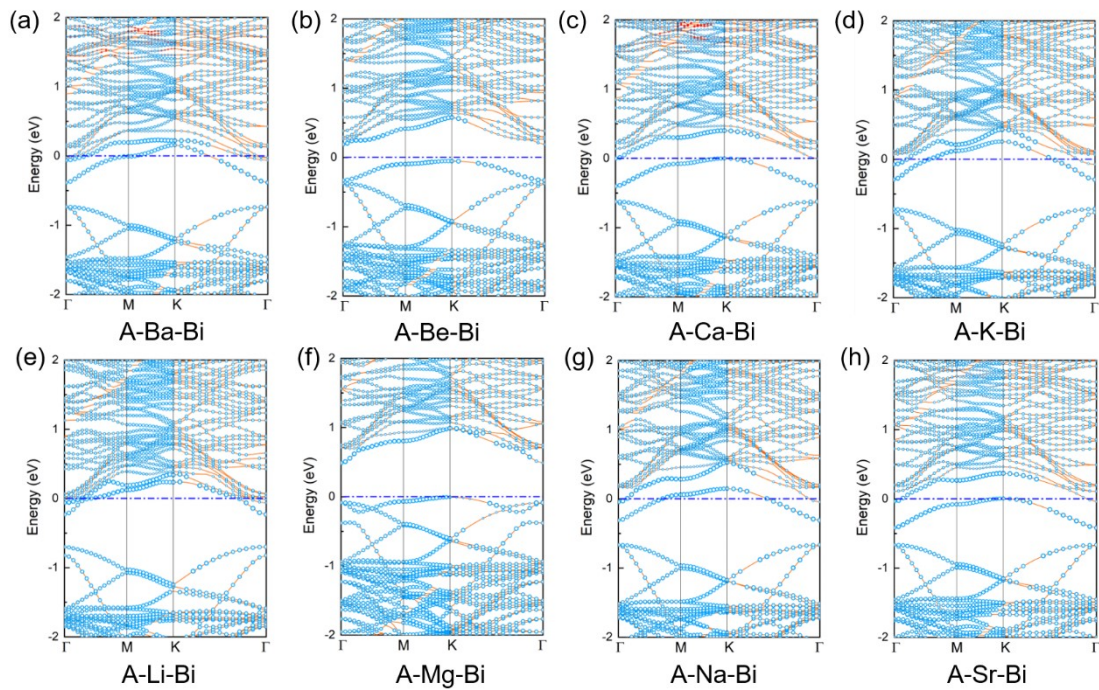

Figure S2. The band structures of A-M-Bi (M = Ba, Be, Ca, K, Li, Mg, Na, S), the blue dotted line presents the Fermi level.

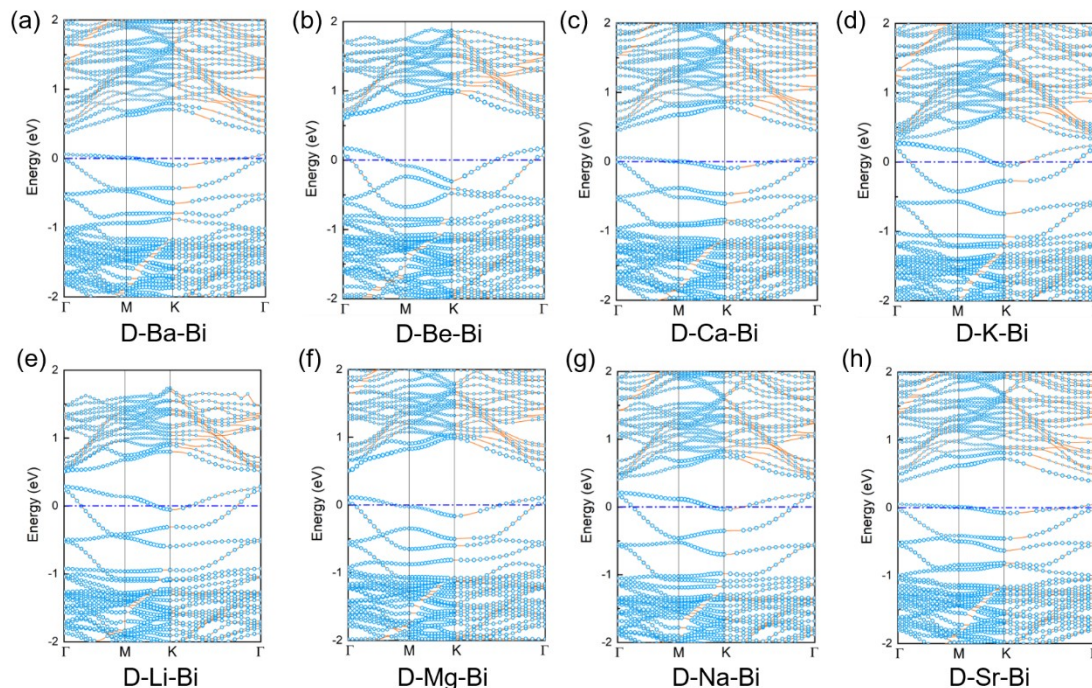

Figure S3. The band structures of D-M-Bi (M = Ba, Be, Ca, K, Li, Mg, Na, S), the blue dotted line presents the Fermi level.

Table S1 Results of the charge transfer from A-M-Bi to H<sub>2</sub>S.

| System  | $\Delta Q$ ( $e$ ) | System  | $\Delta Q$ ( $e$ ) |
|---------|--------------------|---------|--------------------|
| A-Ba-Bi | -0.0151            | A-K-Bi  | -0.0327            |
| A-Be-Bi | 0.1810             | A-Mg-Bi | 0.0580             |
| A-Ca-Bi | 0.0100             | A-Na-Bi | -0.0175            |
| A-Li-Bi | 0.0169             | A-Sr-Bi | -0.0037            |

Table S2 The work function of A-M-Bi ( $W_{A-M-Bi}$ ), A-M-Bi with adsorbed H<sub>2</sub>S ( $W_{A-H_2S}$ ) and the difference of work functions ( $\Delta W$ ).

| System  | $W_{A-M-Bi}$ (eV) | $W_{A-M-Bi}$ (eV) | $\Delta W$ (eV) |
|---------|-------------------|-------------------|-----------------|
| A-Ba-Bi | 3.1521            | 3.0224            | -0.1297         |
| A-Be-Bi | 3.6307            | 3.5213            | -0.1094         |
| A-Ca-Bi | 3.3842            | 3.2496            | -0.1346         |
| A-Li-Bi | 3.3124            | 3.2167            | -0.0957         |
| A-K-Bi  | 3.1303            | 2.9912            | -0.1391         |
| A-Mg-Bi | 3.9427            | 3.8299            | -0.1128         |
| A-Na-Bi | 3.2754            | 3.1335            | -0.1419         |
| A-Sr-Bi | 3.2842            | 3.1034            | -0.1808         |

Table S3 Results of the charge transfer from D-M-Bi to H<sub>2</sub>S.

| System  | $\Delta Q$ ( $e$ ) | System | $\Delta Q$ ( $e$ ) |
|---------|--------------------|--------|--------------------|
| D-Ba-Bi | 0.0052             | D-K-Bi | -0.0061            |

|         |         |         |         |
|---------|---------|---------|---------|
| D-Be-Bi | 0.0008  | D-Mg-Bi | 0.0392  |
| D-Ca-Bi | -0.0296 | D-Na-Bi | -0.0297 |
| D-Li-Bi | 0.0067  | D-Sr-Bi | 0.0423  |

Table S4 The work function of D-M-Bi ( $W_{D-M-Bi}$ ), D-M-Bi with adsorbed H<sub>2</sub>S ( $W_{D-M-Bi}$ ) and the difference of work functions ( $\Delta W$ ).

| System  | $W_{D-M-Bi}$ (eV) | $W_{D-M-Bi}$ (eV) | $\Delta W$ (eV) |
|---------|-------------------|-------------------|-----------------|
| D-Ba-Bi | 3.7355            | 3.4441            | -0.2914         |
| D-Be-Bi | 4.0217            | 3.7667            | -0.255          |
| D-Ca-Bi | 3.8488            | 3.4858            | -0.363          |
| D-Li-Bi | 3.8454            | 3.5096            | -0.3358         |
| D-K-Bi  | 3.6267            | 3.3889            | -0.2378         |
| D-Mg-Bi | 3.9273            | 3.636             | -0.2913         |
| D-Na-Bi | 3.7234            | 3.4482            | -0.2752         |
| D-Sr-Bi | 3.7898            | 3.516             | -0.2738         |
